# Supplementary material for: Chemogenomic model identifies synergistic drug combinations robust to the pathogen microenvironment
Source: PubMed Central journal article supplement (PMC6329523; doi:10.1371/journal.pcbi.1006677), 2018-12-31
Supplement: pcbi.1006677.s013.pdf [file pcbi.1006677.s013.pdf]

|      |                                                                    |
|------|--------------------------------------------------------------------|
| yjyY | Uncharacterized protein YjyY                                       |
| elfD | Probable fimbrial chaperone protein ElfD                           |
| yfbN | Uncharacterized protein YfbN                                       |
| glnA | Glutamine synthetase (GS) (EC 6.3.1.2) (Glutamate--ammonia ligase) |
| yfjH | Uncharacterized protein YfjH                                       |
| ruvC | Crossover junction endodeoxyribonuclease RuvC (EC 3.1.22.4)        |
| glnS | Glutamine--fructose-6-phosphate aminotransferase                   |
| ruvA | Holliday junction ATP-dependent DNA helicase RuvA (EC 3.6.4.12)    |
| recC | RecBCD enzyme subunit RecC (EC 3.1.11.5)                           |
| ybeD | UPF0250 protein YbeD                                               |
