# Supplementary material for: Chemogenomic model identifies synergistic drug combinations robust to the pathogen microenvironment
Source: PubMed Central journal article supplement (PMC6329523; doi:10.1371/journal.pcbi.1006677), 2018-12-31
Supplement: pcbi.1006677.s014.pdf [file pcbi.1006677.s014.pdf]

|      |                                                                    |
|------|--------------------------------------------------------------------|
| glmS | Glutamine--fructose-6-phosphate aminotransferase                   |
| ubiX | Flavin prenyltransferase UbiX (EC 2.5.1.129)                       |
| tdk  | Thymidine kinase (EC 2.7.1.21)                                     |
| elfD | Probable fimbrial chaperone protein ElfD                           |
| yjjY | Uncharacterized protein YjjY                                       |
| yfbN | Uncharacterized protein YfbN                                       |
| ycgG | Probable cyclic di-GMP phosphodiesterase PdeG (EC 3.1.4.52)        |
| rpmE | 50S ribosomal protein L31 (Large ribosomal subunit protein bL31-A) |
| ybfC | Uncharacterized protein YbfC                                       |
| xseA | Exodeoxyribonuclease 7 large subunit (EC 3.1.11.6)                 |
