# Supplementary material for: Chemogenomic model identifies synergistic drug combinations robust to the pathogen microenvironment
Source: PubMed Central journal article supplement (PMC6329523; doi:10.1371/journal.pcbi.1006677), 2018-12-31
Supplement: pcbi.1006677.s015.pdf [file pcbi.1006677.s015.pdf]

| Pathways                                    | Total genes | P-value |
|---------------------------------------------|-------------|---------|
| Alanine, aspartate and glutamate metabolism | 8           | 0.0003  |
| Homologous recombination                    | 7           | 0.001   |
| Oxidative phosphorylation                   | 9           | 0.001   |
| beta-Lactam resistance                      | 5           | 0.001   |
| Mismatch repair                             | 5           | 0.005   |
| Glycerolipid metabolism                     | 3           | 0.013   |
| Lipopolysaccharide biosynthesis             | 5           | 0.013   |
| Galactose metabolism                        | 6           | 0.014   |
| Pyrimidine metabolism                       | 9           | 0.018   |
| Glyoxylate and dicarboxylate metabolism     | 6           | 0.021   |
| Streptomycin biosynthesis                   | 2           | 0.025   |
| C5-Branched dibasic acid metabolism         | 2           | 0.034   |
