# Supplementary material for: Chemogenomic model identifies synergistic drug combinations robust to the pathogen microenvironment
Source: PubMed Central journal article supplement (PMC6329523; doi:10.1371/journal.pcbi.1006677), 2018-12-31
Supplement: pcbi.1006677.s016.pdf [file pcbi.1006677.s016.pdf]

| Pathways                                            | Total genes | P-value  |
|-----------------------------------------------------|-------------|----------|
| Lysine biosynthesis                                 | 3           | 6.93E-05 |
| Aminoacyl-tRNA biosynthesis                         | 2           | 0.000134 |
| Folate biosynthesis                                 | 3           | 0.000302 |
| Sulfur relay system                                 | 3           | 0.00113  |
| Two-component system                                | 10          | 0.004256 |
| Amino sugar and nucleotide sugar metabolism         | 4           | 0.00451  |
| Pentose phosphate pathway                           | 3           | 0.009364 |
| beta-Lactam resistance                              | 2           | 0.011684 |
| Phenylalanine, tyrosine and tryptophan biosynthesis | 2           | 0.025993 |
| ABC transporters                                    | 9           | 0.02702  |
| Fructose and mannose metabolism                     | 3           | 0.031405 |
