# Supplementary material for: Chemogenomic model identifies synergistic drug combinations robust to the pathogen microenvironment
Source: PubMed Central journal article supplement (PMC6329523; doi:10.1371/journal.pcbi.1006677), 2018-12-31
Supplement: pcbi.1006677.s017.pdf [file pcbi.1006677.s017.pdf]

| A. Enriched KEGG pathways among non-orthologous genes | p-value  |
|-------------------------------------------------------|----------|
| eco00540 Lipopolysaccharide biosynthesis              | 0.000324 |
| eco00521 Streptomycin biosynthesis                    | 0.003221 |
| eco03430 Mismatch repair                              | 0.0212   |
| eco00040 Pentose and glucuronate interconversions     | 0.025326 |
| eco00500 Starch and sucrose metabolism                | 0.043669 |

| B. Enriched KEGG pathways among orthologous genes            | p-value  |
|--------------------------------------------------------------|----------|
| eco00190 Oxidative phosphorylation                           | 4.40E-10 |
| eco00250 Alanine, aspartate and glutamate metabolism         | 3.71E-07 |
| eco00230 Purine metabolism                                   | 1.38E-05 |
| eco03440 Homologous recombination                            | 3.24E-05 |
| eco00400 Phenylalanine, tyrosine and tryptophan biosynthesis | 9.17E-05 |
| eco00260 Glycine, serine and threonine metabolism            | 0.000108 |
| eco00340 Histidine metabolism                                | 0.000154 |
| eco00473 D-Alanine metabolism                                | 0.000246 |
| eco00750 Vitamin B6 metabolism                               | 0.000268 |
| eco00240 Pyrimidine metabolism                               | 0.000889 |
