# Supplementary material for: Chemogenomic model identifies synergistic drug combinations robust to the pathogen microenvironment
Source: PubMed Central journal article supplement (PMC6329523; doi:10.1371/journal.pcbi.1006677), 2018-12-31
Supplement: pcbi.1006677.s018.pdf [file pcbi.1006677.s018.pdf]

| <i>A. baumannii</i>           | <i>E. coli</i>                |
|-------------------------------|-------------------------------|
| ActinomycinD + Fusidic acid   | A22 + Fusidicacid             |
| Amoxicillin + Fusidic acid    | ActinomycinD + Fusidicacid    |
| Ampicillin + Aztreonam        | Amikacin + Ampicillin         |
| Ampicillin + Fusidic acid     | Amikacin + Cisplatin          |
| Azithromycin + Fusidic acid   | Amikacin + Fusidicacid        |
| Aztreonam + Fusidic acid      | Ampicillin + Azithromycin     |
| Carbenicillin + Fusidic acid  | Ampicillin + Bacitracin       |
| Ceftazidime + Fusidic acid    | Ampicillin + Calcofluor       |
| Clarythromycin + Fusidic acid | Ampicillin + Carbenicillin    |
| EGCG+ Fusidic acid            | Ampicillin + Cccp             |
| Erythromycin + Fusidic acid   | Ampicillin + Cisplatin        |
| Fusidic acid+ Methotrexate    | Ampicillin + Clarythromycin   |
| Fusidic acid+ Nigericin       | Ampicillin + EGCG             |
| Fusidic acid+ Oxacillin       | Ampicillin + Erythromycin     |
| Fusidic acid+ Rifampicin      | Ampicillin + Fusidicacid      |
| Fusidic acid+ Spiramycin      | Ampicillin + Indolicidin      |
| Fusidic acid+ Tetracycline    | Ampicillin + Methotrexate     |
| Fusidic acid+ Vancomycin      | Ampicillin + Nigericin        |
| Tetracycline + Vancomycin     | Ampicillin + Novobiocin       |
|                               | Ampicillin + Oxacillin        |
|                               | Ampicillin + Phleomycin       |
|                               | Ampicillin + Radicicol        |
|                               | Ampicillin + Rifampicin       |
|                               | Ampicillin + Spiramycin       |
|                               | Ampicillin + Sulfamethizole   |
|                               | Ampicillin + Tetracycline     |
|                               | Ampicillin + Tunicamycin      |
|                               | Ampicillin + Vancomycin       |
|                               | Ampicillin + Verapamil        |
|                               | Azithromycin + Bacitracin     |
|                               | Azithromycin + Carbenicillin  |
|                               | Azithromycin + Cisplatin      |
|                               | Azithromycin + Clarythromycin |
|                               | Azithromycin + Erythromycin   |
|                               | Azithromycin + Fusidicacid    |
|                               | Azithromycin + Novobiocin     |
|                               | Azithromycin + Phleomycin     |
|                               | Azithromycin + Rifampicin     |
|                               | Azithromycin + Spiramycin     |
|                               | Azithromycin + Tetracycline   |
|                               | Azithromycin + Vancomycin     |
|                               | Azithromycin + Verapamil      |
|                               | Bacitracin+ Cisplatin         |
|                               | Bacitracin+ Fusidicacid       |

|  |                                |
|--|--------------------------------|
|  | Bacitracin+ Tetracycline       |
|  | Bleomycin + Fusidicacid        |
|  | Calcofluor+ Cisplatin          |
|  | Calcofluor+ Fusidicacid        |
|  | Carbenicillin + Cisplatin      |
|  | Carbenicillin + Fusidicacid    |
|  | Carbenicillin + Tetracycline   |
|  | Cccp + Fusidicacid             |
|  | Cccp + Tetracycline            |
|  | Cefaclor + Fusidicacid         |
|  | Cefoxitin + Fusidicacid        |
|  | Cefsulodin + Fusidicacid       |
|  | Ceftazidime + Fusidicacid      |
|  | Chir090 + Fusidicacid          |
|  | Chloropromazine+ Fusidicacid   |
|  | Cisplatin + Clarythromycin     |
|  | Cisplatin + Fusidicacid        |
|  | Cisplatin + Methotrexate       |
|  | Cisplatin + Nigericin          |
|  | Cisplatin + Oxacillin          |
|  | Cisplatin + Rifampicin         |
|  | Cisplatin + Spiramycin         |
|  | Cisplatin + Sulfamethizole     |
|  | Cisplatin + Sulfamonomethoxine |
|  | Cisplatin + Tetracycline       |
|  | Cisplatin + Vancomycin         |
|  | Clarythromycin + Fusidicacid   |
|  | Clarythromycin + Novobiocin    |
|  | Clarythromycin + Phleomycin    |
|  | Clarythromycin + Rifampicin    |
|  | Clarythromycin + Tetracycline  |
|  | Clarythromycin + Vancomycin    |
|  | Cycloserined+ Fusidicacid      |
|  | Dibucaine + Fusidicacid        |
|  | Doxorubicin + Fusidicacid      |
|  | Doxycycline + Fusidicacid      |
|  | EGCG+ Fusidicacid              |
|  | Erythromycin + Fusidicacid     |
|  | Erythromycin + Tetracycline    |
|  | Erythromycin + Vancomycin      |
|  | Fusidicacid + Hydroxyurea      |
|  | Fusidicacid + Indolicidin      |
|  | Fusidicacid + Isoniazid        |
|  | Fusidicacid + Mecillinam       |
|  | Fusidicacid + Methotrexate     |

|  |                                  |
|--|----------------------------------|
|  | Fusidicacid + Minocycline        |
|  | Fusidicacid + Nigericin          |
|  | Fusidicacid + Norfloxacin        |
|  | Fusidicacid + Novobiocin         |
|  | Fusidicacid + Oxacillin          |
|  | Fusidicacid + Phleomycin         |
|  | Fusidicacid + Procaine           |
|  | Fusidicacid + Propidiumiodide    |
|  | Fusidicacid + Puromycin          |
|  | Fusidicacid + Radicol            |
|  | Fusidicacid + Rifampicin         |
|  | Fusidicacid + Spectinomycin      |
|  | Fusidicacid + Spiramycin         |
|  | Fusidicacid + Streptonigrin      |
|  | Fusidicacid + Sulfamethizole     |
|  | Fusidicacid + Sulfamonomethoxine |
|  | Fusidicacid + Tetracycline       |
|  | Fusidicacid + Triclosan          |
|  | Fusidicacid + Vancomycin         |
|  | Fusidicacid + Verapamil          |
|  | Novobiocin+ Spiramycin           |
|  | Novobiocin+ Tetracycline         |
|  | Novobiocin+ Vancomycin           |
|  | Oxacillin + Tetracycline         |
|  | Oxacillin + Vancomycin           |
|  | Phleomycin + Tetracycline        |
|  | Rifampicin + Tetracycline        |
|  | Spiramycin+ Tetracycline         |
|  | Tetracycline + Vancomycin        |
|  | Tetracycline + Verapamil         |
