# Supplementary material for: Chemogenomic model identifies synergistic drug combinations robust to the pathogen microenvironment
Source: PubMed Central journal article supplement (PMC6329523; doi:10.1371/journal.pcbi.1006677), 2018-12-31
Supplement: pcbi.1006677.s019.pdf [file pcbi.1006677.s019.pdf]

| <i>S. aureus</i>              | <i>M. tuberculosis</i>        |
|-------------------------------|-------------------------------|
| A22 + Fusidicacid             | A22 + Fusidicacid             |
| Actinomycind + Ampicillin     | Actinomycind + Ampicillin     |
| Actinomycind + Cisplatin      | Actinomycind + Cisplatin      |
| Actinomycind + Fusidicacid    | Actinomycind + Fusidicacid    |
| Amikacin + Ampicillin         | Amikacin + Ampicillin         |
| Amikacin + Cisplatin          | Amikacin + Cisplatin          |
| Amikacin + Fusidicacid        | Amikacin + Fusidicacid        |
| Amoxicillin + Fusidicacid     | Amoxicillin + Fusidicacid     |
| Ampicillin + Azithromycin     | Ampicillin + Azithromycin     |
| Ampicillin + Aztreonam        | Ampicillin + Aztreonam        |
| Ampicillin + Bacitracin       | Ampicillin + Bacitracin       |
| Ampicillin + Calcofluor       | Ampicillin + Calcofluor       |
| Ampicillin + Cccp             | Ampicillin + Cccp             |
| Ampicillin + Cisplatin        | Ampicillin + Cisplatin        |
| Ampicillin + Clarythromycin   | Ampicillin + Clarythromycin   |
| Ampicillin + EGCG             | Ampicillin + EGCG             |
| Ampicillin + Erythromycin     | Ampicillin + Erythromycin     |
| Ampicillin + Fusidicacid      | Ampicillin + Fusidicacid      |
| Ampicillin + Indolicidin      | Ampicillin + Indolicidin      |
| Ampicillin + Mecillinam       | Ampicillin + Mecillinam       |
| Ampicillin + Novobiocin       | Ampicillin + Novobiocin       |
| Ampicillin + Oxacillin        | Ampicillin + Oxacillin        |
| Ampicillin + Phleomycin       | Ampicillin + Phleomycin       |
| Ampicillin + Radicol          | Ampicillin + Radicol          |
| Ampicillin + Rifampicin       | Ampicillin + Rifampicin       |
| Ampicillin + Spiramycin       | Ampicillin + Spiramycin       |
| Ampicillin + Sulfamethizole   | Ampicillin + Sulfamethizole   |
| Ampicillin + Tetracycline     | Ampicillin + Tetracycline     |
| Ampicillin + Tunicamycin      | Ampicillin + Tunicamycin      |
| Ampicillin + Vancomycin       | Ampicillin + Vancomycin       |
| Ampicillin + Verapamil        | Ampicillin + Verapamil        |
| Azithromycin + Cisplatin      | Azithromycin + Ceftazidime    |
| Azithromycin + Clarythromycin | Azithromycin + Cisplatin      |
| Azithromycin + Erythromycin   | Azithromycin + Clarythromycin |
| Azithromycin + Fusidicacid    | Azithromycin + Erythromycin   |
| Azithromycin + Oxacillin      | Azithromycin + Fusidicacid    |
| Azithromycin + Phleomycin     | Azithromycin + Oxacillin      |
| Azithromycin + Rifampicin     | Azithromycin + Phleomycin     |
| Azithromycin + Spiramycin     | Azithromycin + Rifampicin     |
| Azithromycin + Tetracycline   | Azithromycin + Spiramycin     |
| Azithromycin + Vancomycin     | Azithromycin + Tetracycline   |
| Azithromycin + Verapamil      | Azithromycin + Vancomycin     |
| Aztreonam + Cisplatin         | Azithromycin + Verapamil      |
| Aztreonam + Fusidicacid       | Aztreonam + Cisplatin         |
| Bacitracin + Fusidicacid      | Aztreonam + Fusidicacid       |

|                               |                                |
|-------------------------------|--------------------------------|
| Bleomycin + Fusidicacid       | Bacitracin + Fusidicacid       |
| Calcofluor + Fusidicacid      | Bleomycin + Fusidicacid        |
| Carbenicillin + Fusidicacid   | Calcofluor + Cisplatin         |
| Cccp + Cisplatin              | Calcofluor + Fusidicacid       |
| Cccp + Fusidicacid            | Carbenicillin + Cisplatin      |
| Cccp + Tetracycline           | Carbenicillin + Fusidicacid    |
| Cecropinb + Fusidicacid       | Cccp + Cisplatin               |
| Cefaclor + Fusidicacid        | Cccp + Fusidicacid             |
| Cefoxitin + Fusidicacid       | Cccp + Tetracycline            |
| Cefsulodin + Fusidicacid      | Cecropinb + Fusidicacid        |
| Ceftazidime + Fusidicacid     | Cefaclor + Fusidicacid         |
| Ceftazidime + Tetracycline    | Cefoxitin + Fusidicacid        |
| Chir090 + Fusidicacid         | Cefsulodin + Fusidicacid       |
| Chlorpromazine + Fusidicacid  | Ceftazidime + Cisplatin        |
| Cisplatin + Clarythromycin    | Ceftazidime + Fusidicacid      |
| Cisplatin + Fusidicacid       | Ceftazidime + Tetracycline     |
| Cisplatin + Mecillinam        | Chir090 + Fusidicacid          |
| Cisplatin + Oxacillin         | Chlorpromazine + Fusidicacid   |
| Cisplatin + Phleomycin        | Cisplatin + Clarythromycin     |
| Cisplatin + Spiramycin        | Cisplatin + EGCG               |
| Cisplatin + Sulfamethizole    | Cisplatin + Fusidicacid        |
| Cisplatin + Vancomycin        | Cisplatin + Indolicidin        |
| Clarythromycin + Fusidicacid  | Cisplatin + Mecillinam         |
| Clarythromycin + Novobiocin   | Cisplatin + Oxacillin          |
| Clarythromycin + Phleomycin   | Cisplatin + Phleomycin         |
| Clarythromycin + Rifampicin   | Cisplatin + Spiramycin         |
| Clarythromycin + Spiramycin   | Cisplatin + Sulfamethizole     |
| Clarythromycin + Tetracycline | Cisplatin + Sulfamonomethoxine |
| Clarythromycin + Vancomycin   | Cisplatin + Tetracycline       |
| Cycloserined + Fusidicacid    | Cisplatin + Vancomycin         |
| Doxycycline + Fusidicacid     | Clarythromycin + Fusidicacid   |
| EGCG + Fusidicacid            | Clarythromycin + Novobiocin    |
| Erythromycin + Fusidicacid    | Clarythromycin + Spiramycin    |
| Fusidicacid + Glufosfomycin   | Clarythromycin + Tetracycline  |
| Fusidicacid + Hydroxyurea     | Clarythromycin + Vancomycin    |
| Fusidicacid + Indolicidin     | Cycloserined + Fusidicacid     |
| Fusidicacid + Isoniazid       | Dibucaine + Fusidicacid        |
| Fusidicacid + Mecillinam      | Doxycycline + Fusidicacid      |
| Fusidicacid + Methotrexate    | EGCG + Fusidicacid             |
| Fusidicacid + Minocycline     | Erythromycin + Fusidicacid     |
| Fusidicacid + Nigericin       | Fusidicacid + Glufosfomycin    |
| Fusidicacid + Novobiocin      | Fusidicacid + Hydroxyurea      |
| Fusidicacid + Oxacillin       | Fusidicacid + Indolicidin      |
| Fusidicacid + Phleomycin      | Fusidicacid + Isoniazid        |
| Fusidicacid + Propidiumiodide | Fusidicacid + Mecillinam       |
| Fusidicacid + Puromycin       | Fusidicacid + Methotrexate     |

|                                  |                                  |
|----------------------------------|----------------------------------|
| Fusidicacid + Radicicol          | Fusidicacid + Minocycline        |
| Fusidicacid + Rifampicin         | Fusidicacid + Nigericin          |
| Fusidicacid + Spectinomycin      | Fusidicacid + Novobiocin         |
| Fusidicacid + Spiramycin         | Fusidicacid + Oxacillin          |
| Fusidicacid + Sulfamethizole     | Fusidicacid + Phleomycin         |
| Fusidicacid + Sulfamonomethoxine | Fusidicacid + Propidiumiodide    |
| Fusidicacid + Tetracycline       | Fusidicacid + Puromycin          |
| Fusidicacid + Triclosan          | Fusidicacid + Radicicol          |
| Fusidicacid + Vancomycin         | Fusidicacid + Rifampicin         |
| Fusidicacid + Verapamil          | Fusidicacid + Spectinomycin      |
| Novobiocin + Tetracycline        | Fusidicacid + Spiramycin         |
| Oxacillin + Tetracycline         | Fusidicacid + Sulfamethizole     |
| Oxacillin + Vancomycin           | Fusidicacid + Sulfamonomethoxine |
| Phleomycin + Tetracycline        | Fusidicacid + Tetracycline       |
| Spiramycin + Tetracycline        | Fusidicacid + Triclosan          |
| Spiramycin + Vancomycin          | Fusidicacid + Vancomycin         |
| Tetracycline + Vancomycin        | Fusidicacid + Verapamil          |
|                                  | Oxacillin + Tetracycline         |
|                                  | Oxacillin + Vancomycin           |
|                                  | Phleomycin + Tetracycline        |
|                                  | Spiramycin + Tetracycline        |
|                                  | Tetracycline + Vancomycin        |
